# Supplementary material
Source: Springer Nature journal article supplement (https://www.springermedizin.de/resource/supplementary/12876_2010_562_MOESM2_ESM.pdf/9437262)
Supplement: MOESM2 [file 9437262]

**A**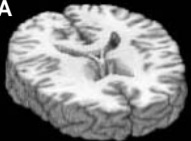

Control

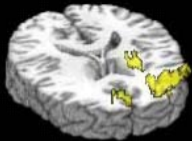

RE

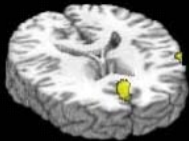

NERD+

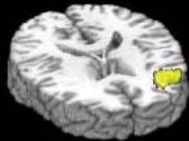

NERD-SI+

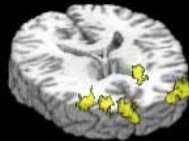

NERD-SI-

**B**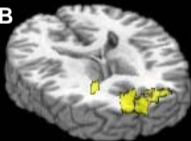

RE vs. NERD+

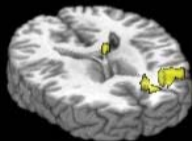

RE vs. NERD-SI+

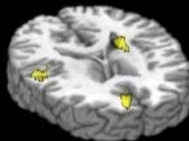

RE vs. NERD-SI-

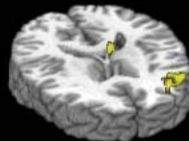

NERD-SI+ vs. NERD+

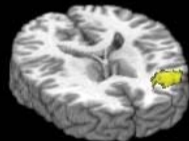

NERD-SI+ vs. NERD-SI-
